# Supplementary material
Source: PubMed Central journal article supplement (PMC10028811)
Supplement: media-1.pdf [file media-1.pdf]

Supplemental Data for:

**The Multidrug Resistance Transporter P-glycoprotein Confers Resistance to Ferroptosis Inducers**

William J. E. Frye, Lyn M. Huff, José M. González Dalmasy, Paula Salazar, Rachel M. Carter, Ryan T. Gensler, Dominic Esposito, Robert W. Robey, Suresh V. Ambudkar, Michael M. Gottesman

**Table S1.** Cross resistance profile of OVCAR8 and NCI/ADR-RES cells with ferroptosis inducers

| Compound ( $\mu\text{M}$ ) | OVCAR8 GI <sub>50</sub> | NCI/ADR-RES GI <sub>50</sub> | OVCAR8+<br>verapamil GI <sub>50</sub> | NCI/ADR-RES+<br>verapamil GI <sub>50</sub> |
|----------------------------|-------------------------|------------------------------|---------------------------------------|--------------------------------------------|
| Erastin                    | 2.19 $\pm$ 1.66         | 2.07 $\pm$ 1.69              |                                       |                                            |
| Erastin2                   | 0.15 $\pm$ 0.10         | 0.14 $\pm$ 0.10              |                                       |                                            |
| Imidazole ketone erastin   | 0.36 $\pm$ 0.23         | 137.8 $\pm$ 45.38            | 0.36 $\pm$ 0.23                       | 0.55 $\pm$ 0.07                            |
| Piperazine erastin         | 2.15 $\pm$ 0.18         | 34.52 $\pm$ 9.98             | 2.29 $\pm$ 0.05                       | 4.11 $\pm$ 0.97                            |
| FIN56                      | 0.47 $\pm$ 0.28         | 82.41 $\pm$ 4.78             | 0.84 $\pm$ 0.51                       | 0.28 $\pm$ 0.22                            |
| JKE-1674                   | 1.69 $\pm$ 0.65         | 0.81 $\pm$ 0.40              |                                       |                                            |
| RSL3                       | 0.05 $\pm$ 0.04         | 0.06 $\pm$ 0.03              |                                       |                                            |
| FinO <sub>2</sub>          | 1.79 $\pm$ 0.35         | 0.92 $\pm$ 0.23              |                                       |                                            |
| PACMA31                    | 0.13 $\pm$ 0.04         | 0.14 $\pm$ 0.08              |                                       |                                            |
| ML-210                     | 0.2 $\pm$ 0.10          | 0.08 $\pm$ 0.04              |                                       |                                            |
| GPX4 Inhib 26a             | 0.18 $\pm$ 0.13         | 0.14 $\pm$ 0.08              |                                       |                                            |
| ML-162                     | 0.2 $\pm$ 0.03          | 0.16 $\pm$ 0.09              |                                       |                                            |
| JKE-1716                   | 14.24 $\pm$ 4.55        | 8.42 $\pm$ 5.00              |                                       |                                            |
| Erastin                    | 2.19 $\pm$ 1.66         | 2.07 $\pm$ 1.69              |                                       |                                            |
| Erastin2                   | 0.15 $\pm$ 0.10         | 0.14 $\pm$ 0.10              |                                       |                                            |

Results presented are mean GI<sub>50</sub> values  $\pm$  SEM. Three independent experiments were performed.

Table S2. Cross resistance profile of UO-31 cells and ABCB1-knockout clones

| <b>Compound</b>               | <b>UO-31</b>  | <b>UO-31 B11</b> | <b>UO-31</b> |
|-------------------------------|---------------|------------------|--------------|
| Romidepsin (ng/ml)            | 42.005 ± 8.53 | 2.801 ± 1.15     | 2.93 ± 0.95  |
| Erastin (μM)                  | 0.428 ± 0.20  | 0.582 ± 0.02     | 0.582 ± 0.02 |
| Imidazole ketone erastin (μM) | 2.235 ± 0.14  | 0.613 ± 0.05     | 0.583 ± 0.01 |
| Piperazine erastin (μM)       | 6.106 ± 0.93  | 2.159 ± 0.31     | 1.949 ± 0.14 |

Results presented are mean GI<sub>50</sub> values +/- SEM. Three independent experiments were performed.
